# Supplementary material for: The Trade-Off between Enteric and Manure Methane Emissions and Their Bacterial Ecology in Lactating Cows Fed Diets Varying in Forage-to-Concentrate Ratio and Rapeseed Oil
Source: MDPI journal article supplement (doi:10.3390/methane3010002), 2024-01-09

# **The trade-off between enteric and manure methane emissions and their bacterial ecology in lactating cows fed diets varying in forage to concentrate ratio and rapeseed oil**

Babak Darabighane, Ilma Tapio, Saija Rasi, Ari-Matti Seppänen, Lucia Blasco, Seppo Ahvenjärvi and Ali-Reza Bayat

## **Supplementary material**

**Supplemental Table S1.** Effects of forage to concentrate ratio and dietary rapeseed oil supplement on alpha diversity of ruminal and fecal bacteria

|                    | Diversity     | Treatment <sup>1</sup> |       |       |       |       | <i>P</i> -value <sup>2</sup> |      |       |
|--------------------|---------------|------------------------|-------|-------|-------|-------|------------------------------|------|-------|
|                    | estimate      | HF                     | HFO   | LF    | LFO   | SEM   | FC                           | RO   | FC×RO |
| Rumen              | Shannon       | 5.78                   | 5.52  | 5.69  | 5.63  | 0.151 | 0.95                         | 0.29 | 0.50  |
|                    | Simpson       | 0.996                  | 0.994 | 0.996 | 0.996 | 0.001 | 0.53                         | 0.27 | 0.38  |
|                    | Observed ASVs | 439                    | 374   | 400   | 379   | 378.8 | 0.69                         | 0.34 | 0.61  |
| Feces <sup>3</sup> | Shannon       | 5.55                   | 5.41  | 5.65  | 5.61  | 0.085 | 0.05                         | 0.20 | 0.47  |
|                    | Simpson       | 0.995                  | 0.994 | 0.996 | 0.996 | 0.001 | 0.09                         | 0.25 | 0.41  |
|                    | Observed ASVs | 335                    | 301   | 372   | 352   | 21.3  | 0.03                         | 0.13 | 0.64  |
| Feces, BMP         | Shannon       | 5.38                   | 5.32  | 5.41  | 5.39  | 0.051 | 0.30                         | 0.40 | 0.58  |
|                    | Simpson       | 0.994                  | 0.993 | 0.994 | 0.994 | 0.001 | 0.27                         | 0.11 | 0.27  |
|                    | Observed ASVs | 306                    | 309   | 321   | 323   | 20.4  | 0.42                         | 0.90 | 0.97  |
| Feces, static      | Shannon       | 5.27                   | 5.24  | 5.59  | 5.32  | 0.086 | 0.05                         | 0.12 | 0.20  |
|                    | Simpson       | 0.993                  | 0.993 | 0.996 | 0.994 | 0.001 | 0.04                         | 0.28 | 0.27  |
|                    | Observed ASVs | 275                    | 257   | 357   | 272   | 31.2  | 0.14                         | 0.12 | 0.28  |

<sup>1</sup> Refers to diets based on high (0.65) or low (0.35) forage ratio supplemented with 0 (HF and LF, respectively) or 5.0% (HFO and LFO, respectively) of rapeseed oil on DM basis. Values are LS means and pooled SEM for n = 4.

<sup>2</sup> FC, effect of forage to concentrate ratio in the diet; RO, effect of rapeseed oil supplement; FC × RO, interaction of FC and RO.

<sup>3</sup> Feces refer to feces collected from animals; Feces, BMP, biochemical methane potential; Feces, static, *in vitro* incubation for 75 days without using inoculum, mixing and NaHCO<sub>3</sub> buffer under temperature of 25°C.

**Supplemental Table S2.** Effects of forage to concentrate ratio and dietary rapeseed oil supplement on abundance (%) of ruminal bacteria

| Bacterial taxa                         | Treatment <sup>1</sup> |      |      |      | SEM  | P-value <sup>2</sup> |       |       |
|----------------------------------------|------------------------|------|------|------|------|----------------------|-------|-------|
|                                        | HF                     | HFO  | LF   | LFO  |      | FC                   | RO    | FC×RO |
| <i>Bacteroidales RF16 group</i>        | 3.0                    | 2.2  | 1.4  | 0.85 | 0.38 | 0.007                | 0.48  | 0.94  |
| <i>Paraprevotella</i>                  | 1.0                    | 0.77 | 1.8  | 1.7  | 0.3  | 0.011                | 0.80  | 0.96  |
| <i>Prevotellaceae UCG-001</i>          | 3.2                    | 2.7  | 3.6  | 3.6  | 0.2  | 0.038                | 0.31  | 0.34  |
| <i>Fibrobacter</i>                     | 1.3                    | 1.5  | 1.4  | 0.52 | 0.24 | 0.023                | 0.28  | 0.026 |
| <i>Christensenellaceae R-7 group</i>   | 4.1                    | 4.1  | 2.1  | 2.8  | 0.6  | 0.008                | 0.50  | 0.12  |
| <i>Saccharofermentans</i>              | 2.0                    | 1.9  | 1.6  | 1.0  | 0.1  | 0.003                | 0.37  | 0.31  |
| <i>Acetitomaculum</i>                  | 1.5                    | 1.4  | 3.1  | 2.5  | 0.4  | 0.005                | 0.99  | 0.78  |
| <i>[Ruminococcus] gauvreauui group</i> | 0.72                   | 0.74 | 1.3  | 1.4  | 0.18 | 0.004                | 0.07  | 0.66  |
| <i>Ruminococcaceae spp.</i>            | 0.55                   | 0.29 | 1.4  | 1.5  | 0.30 | 0.004                | 0.67  | 0.28  |
| <i>WCHB1-41</i>                        | 2.0                    | 1.2  | 0.53 | 0.72 | 0.23 | 0.004                | 0.41  | 0.056 |
| <i>Succiniclasticum</i>                | 1.0                    | 1.3  | 1.4  | 1.4  | 0.1  | 0.037                | 0.011 | 0.50  |
| <i>Candidatus Saccharimonas</i>        | 1.6                    | 0.74 | 0.90 | 0.27 | 0.16 | 0.005                | 0.010 | 0.69  |
| <i>Bacteroidales g F082</i>            | 1.4                    | 1.6  | 1.3  | 1.9  | 0.3  | 0.44                 | 0.002 | 0.29  |
| <i>Clostridia UCG-014</i>              | 2.1                    | 1.1  | 3.3  | 1.1  | 0.3  | 0.21                 | 0.008 | 0.58  |

<sup>1</sup> Refers to diets based on high (0.65) or low (0.35) forage ratio supplemented with 0 (HF and LF, respectively) or 5.0% (HFO and LFO, respectively) of rapeseed oil on DM basis. Values are LS means and pooled SEM for n = 4

<sup>2</sup> FC, effect of forage to concentrate ratio in the diet; RO, effect of rapeseed oil supplement; FC × RO, interaction of FC and RO.

**Supplemental Table S3.** Association between relative abundance of rumen bacteria at genus level and enteric methane production calculated as methane intensity (g/kg milk or ECM)<sup>1</sup>

| Bacterial taxa                     | CH <sub>4</sub> /milk (g/kg) | CH <sub>4</sub> /ECM (g/kg) |
|------------------------------------|------------------------------|-----------------------------|
| <i>Bacteroidales RF16 group</i>    | 0.64                         | 0.67                        |
| <i>Rikenellaceae RC9 gut group</i> | 0.52                         | 0.45                        |
| <i>Saccharofermentans</i>          | 0.62                         | 0.54                        |
| <i>Succiniclasticum</i>            | -0.70                        | -0.62                       |
| <i>Candidatus Saccharimonas</i>    | 0.75                         | 0.67                        |
| <i>Succinivibrionaceae UCG-002</i> | -0.69                        | -0.66                       |

<sup>1</sup>The values in the table show Spearman's correlation coefficients. Only significant ( $P < 0.05$ ) correlations are presented.

**Supplemental Table S4.** Association between relative abundance of faecal bacteria at genus level and enteric methane production from static manure incubation experiment. Methane output was calculated as g/d. <sup>1</sup>

| Bacterial taxa                        | CH <sub>4</sub> (g/d) |
|---------------------------------------|-----------------------|
| <i>Methanosarcina</i>                 | 0.91                  |
| <i>Muribaculaceae</i>                 | -0.59                 |
| <i>Prevotellaceae</i> UCG-004         | -0.58                 |
| <i>Alistipes</i>                      | -0.67                 |
| <i>Rikenellaceae</i> RC9 gut group    | -0.54                 |
| <i>Izemoplasmatales</i>               | 0.78                  |
| <i>Clostridia</i> vadinBB60 group     | 0.83                  |
| <i>Clostridium sensu stricto</i> 1    | -0.31                 |
| <i>Oscillospiraceae</i> genus UCG-005 | -0.63                 |
| <i>Romboutsia</i>                     | -0.77                 |
| <i>Treponema</i>                      | -0.64                 |

<sup>1</sup>The values in the table show Spearman's correlation coefficients. Only significant ( $P < 0.05$ ) correlations are presented.

**Supplemental Figure S1.** Effects of forage to concentrate ratio and dietary rapeseed oil supplement on beta diversity of ruminal bacteria. Treatments refer to diets based on high (0.65) or low (0.35) forage ratio supplemented with 0 (HF and LF, respectively) or 5.0% (HFO and LFO, respectively) of rapeseed oil on DM basis.

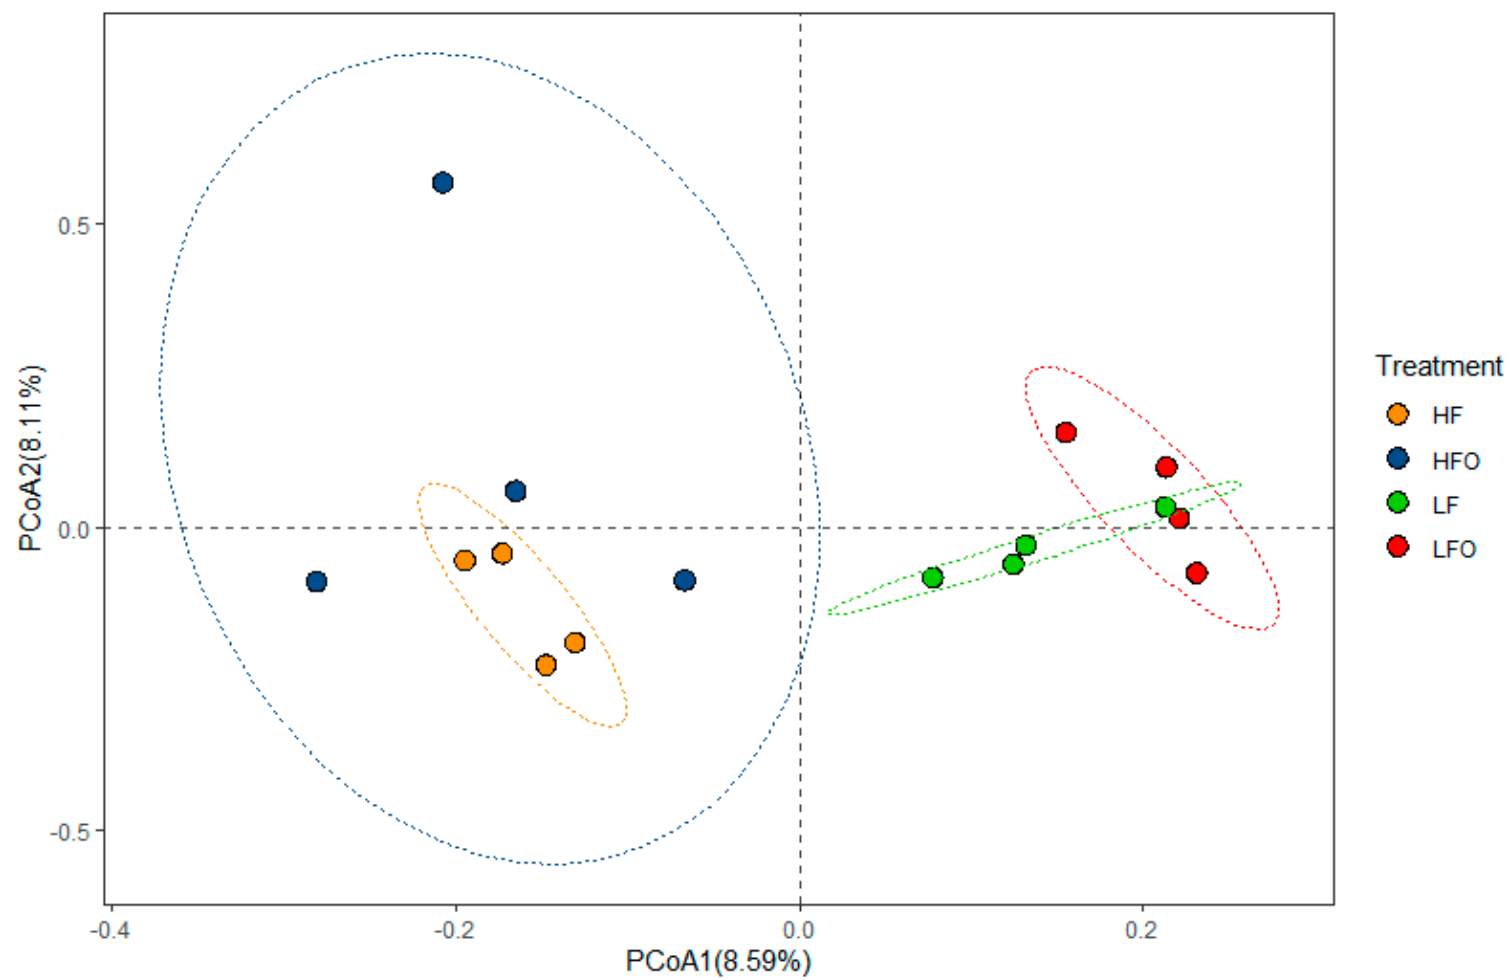

**Supplemental Figure S2.** Alpha diversity estimates for fecal samples before incubation experiment (NOT-INC) and after manure BMP (BMP), and static (STAT) incubation trials.

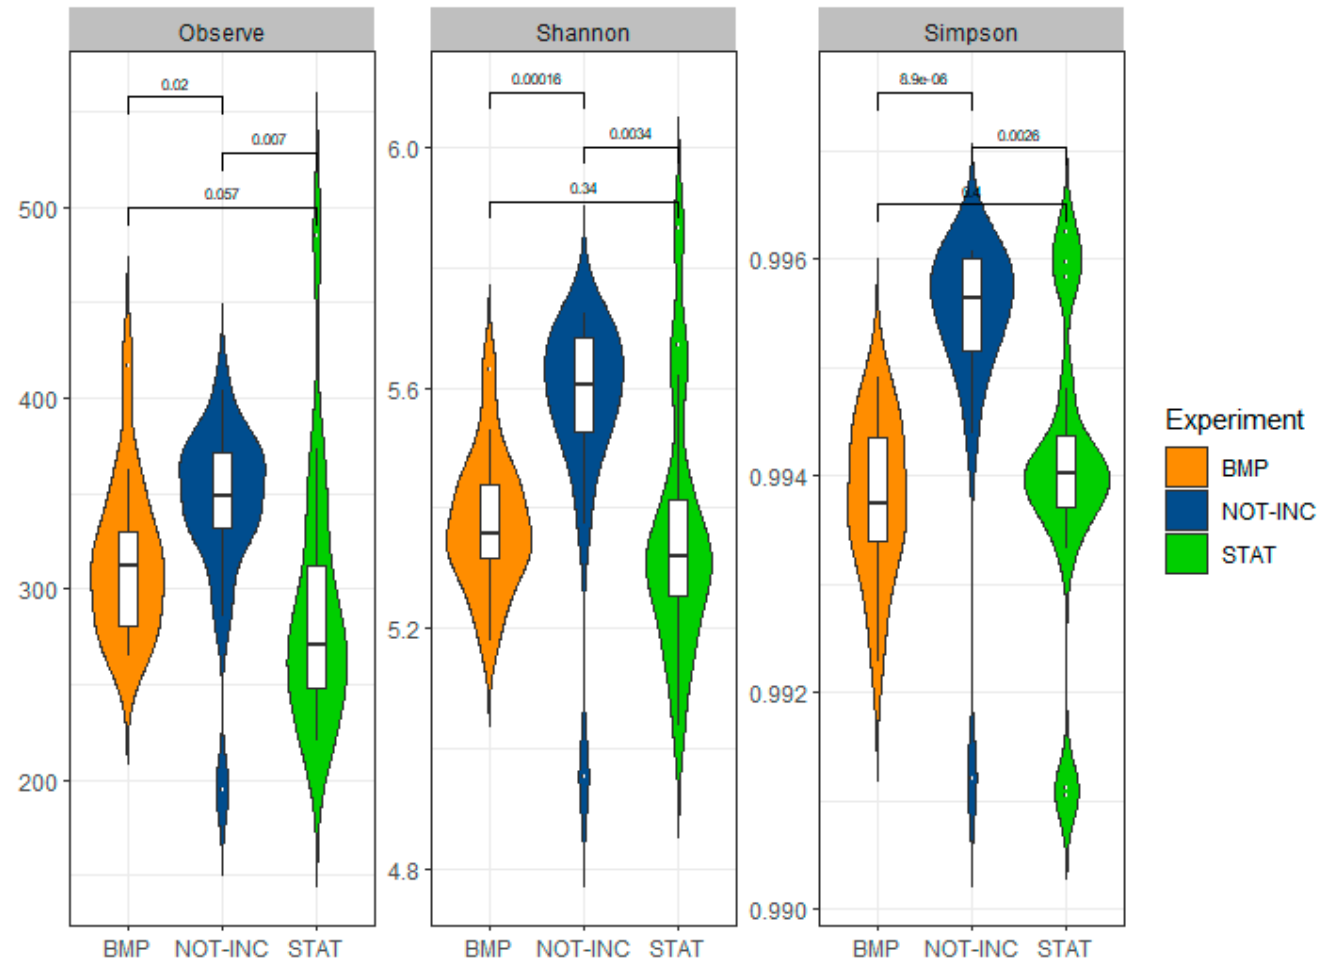

**Supplemental Figure S3.** Beta diversity for fecal samples before incubation experiment (NOT-INC) and after manure BMP (BMP), and static (STAT) incubation trials.

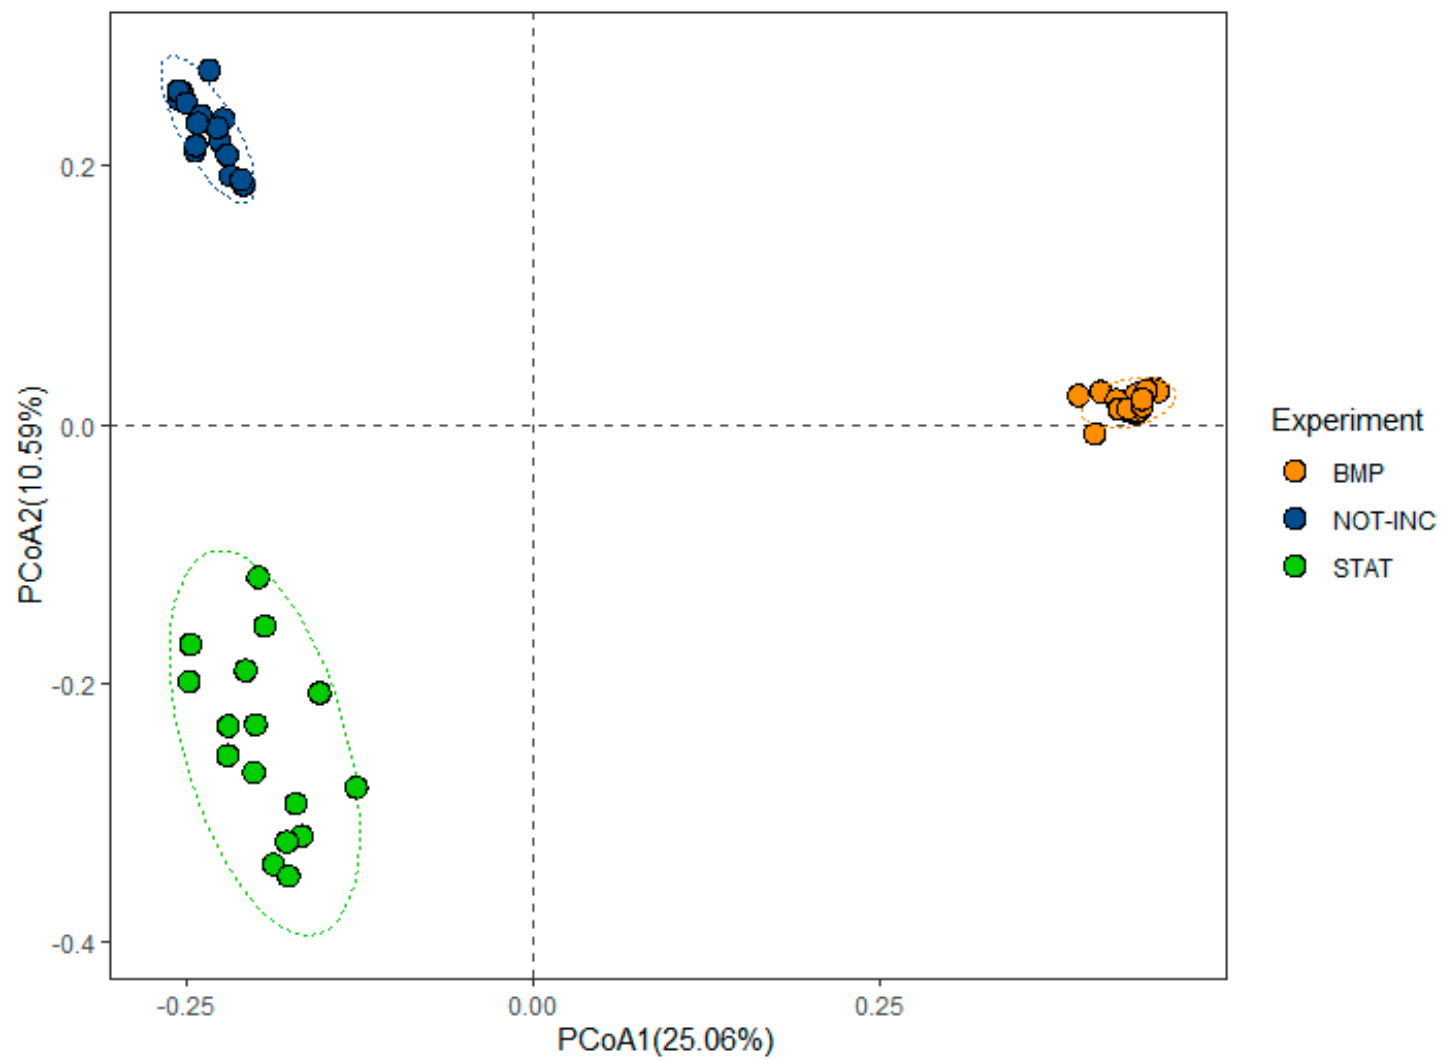



**Supplemental Figure S4.** Effects of forage to concentrate ratio and dietary rapeseed oil supplement on beta diversity of fecal bacteria before incubation (A), after BMP (B) and static manure incubation experiments (C). Treatments refer to diets based on high (0.65) or low (0.35) forage ratio supplemented with 0 (HF and LF, respectively) or 5.0% (HFO and LFO, respectively) of rapeseed oil on DM basis

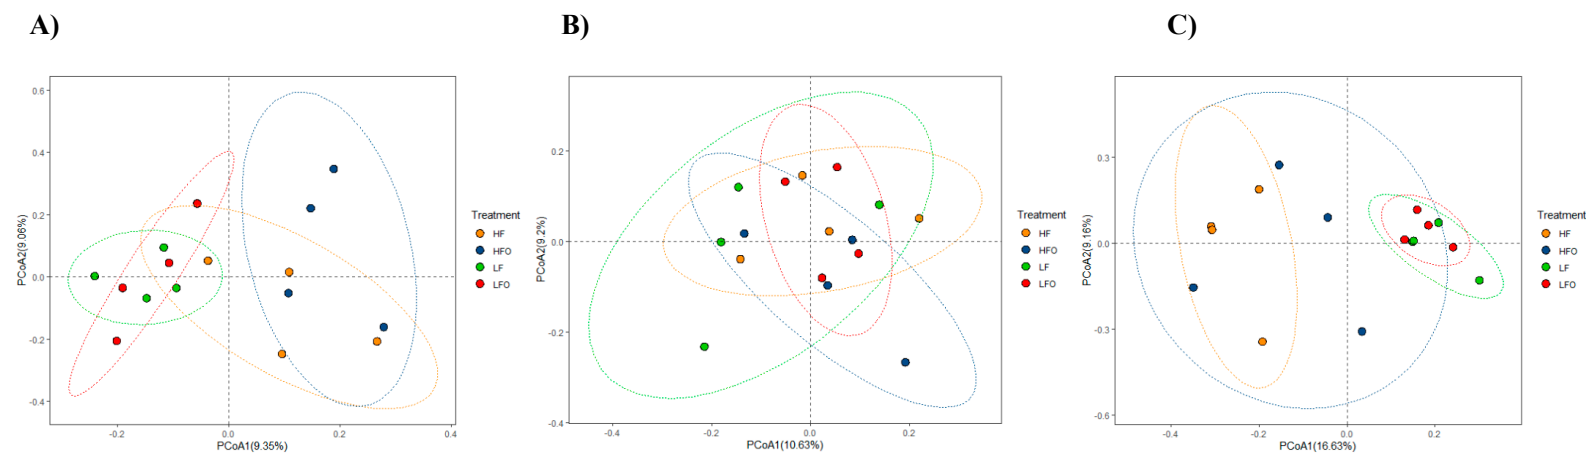

Supplement: s1 [file s1]
